# Supplementary material for: A robust and sensitive flexible strain sensor based on polyurethane cross-linked composite hydrogels for the detection of human motion
Source: Royal Society of Chemistry journal article supplement (doi:10.1039/d2nj03740h), 2022-01-01
Supplement: d2nj03740h1.pdf [file d2nj03740h1.pdf]

## Supporting Information

### Robust and sensitive flexible strain sensor based on polyurethane cross-linked composite hydrogels for human motion detection

Xiao Wen, Haibo Wang, Erhui Ren, Shuang Wang\*, Junhuai Xu\*

College of Biomass Science and Engineering, Sichuan University, Chengdu 610065, P. R. China.

**\*Corresponding Authors:**

E-mail: xujunhuaiup@163.com (Junhuai Xu), wangshuang930108@163.com (Shuang Wang)

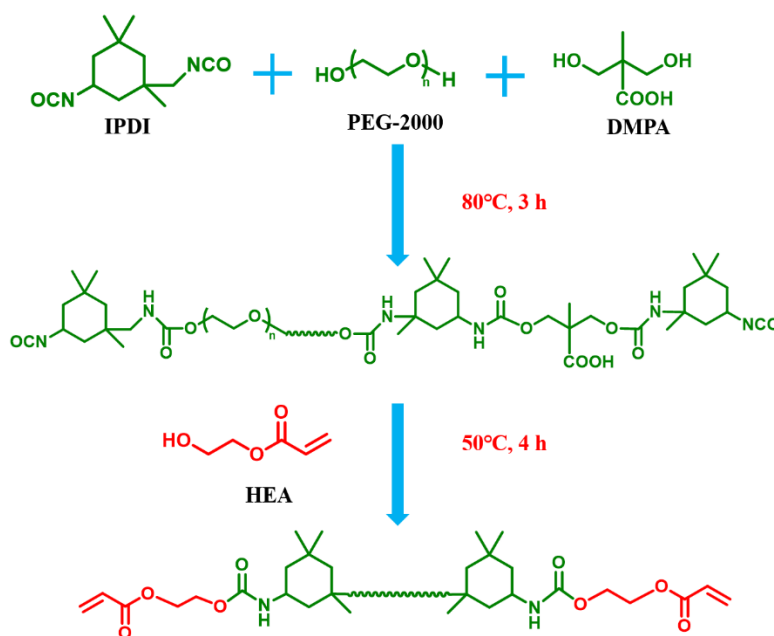

Fig. S1 Synthesis route of DPU

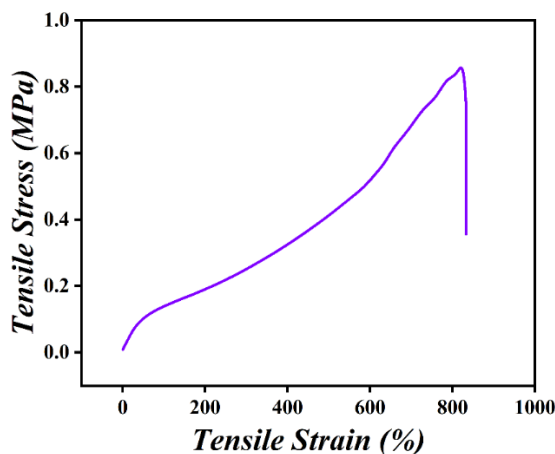

Fig. S2 Stress-strain curve of PPMD-0.5 hydrogel without MXene

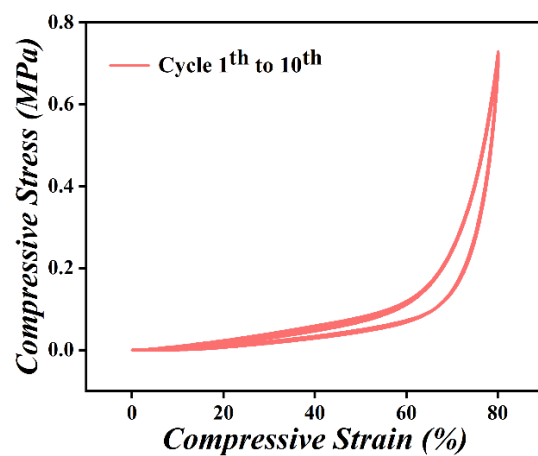

Fig. S3 Cyclic loading-unloading curves of PPMD-0.5 hydrogel under 80% compressive strain for 10 cycles

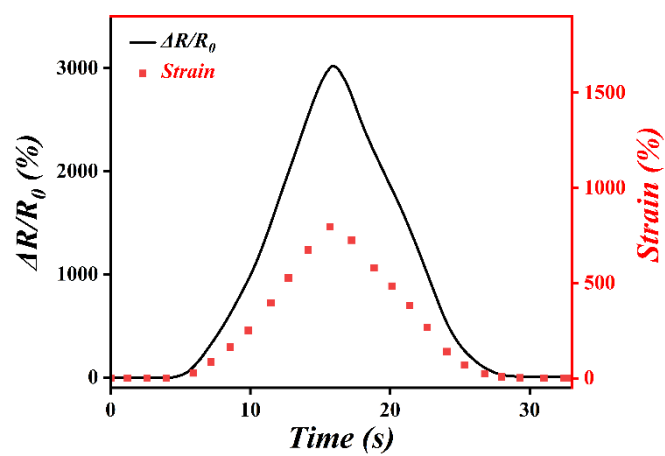

Fig. S4 The resistance change of PPMD-0.5 hydrogel during loading and unloading
